# Supplementary material for: Impact of grid spacing, convective parameterization and cloud microphysics in ICON simulations of a warm conveyor belt
Source: Copernicus journal article supplement (doi:10.5194/wcd-3-1199-2022), 2022-10-27
Supplement: Supplementary file 1 [file wcd-3-1199-2022-supplement.pdf]

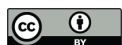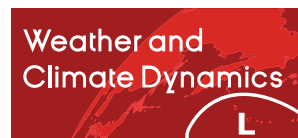

Open Access

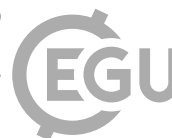

*Supplement of*

## **Impact of grid spacing, convective parameterization and cloud microphysics in ICON simulations of a warm conveyor belt**

**Anubhav Choudhary and Aiko Voigt**

*Correspondence to:* Anubhav Choudhary ([anubhav.choudhary@kit.edu](mailto:anubhav.choudhary@kit.edu))

The copyright of individual parts of the supplement might differ from the article licence.

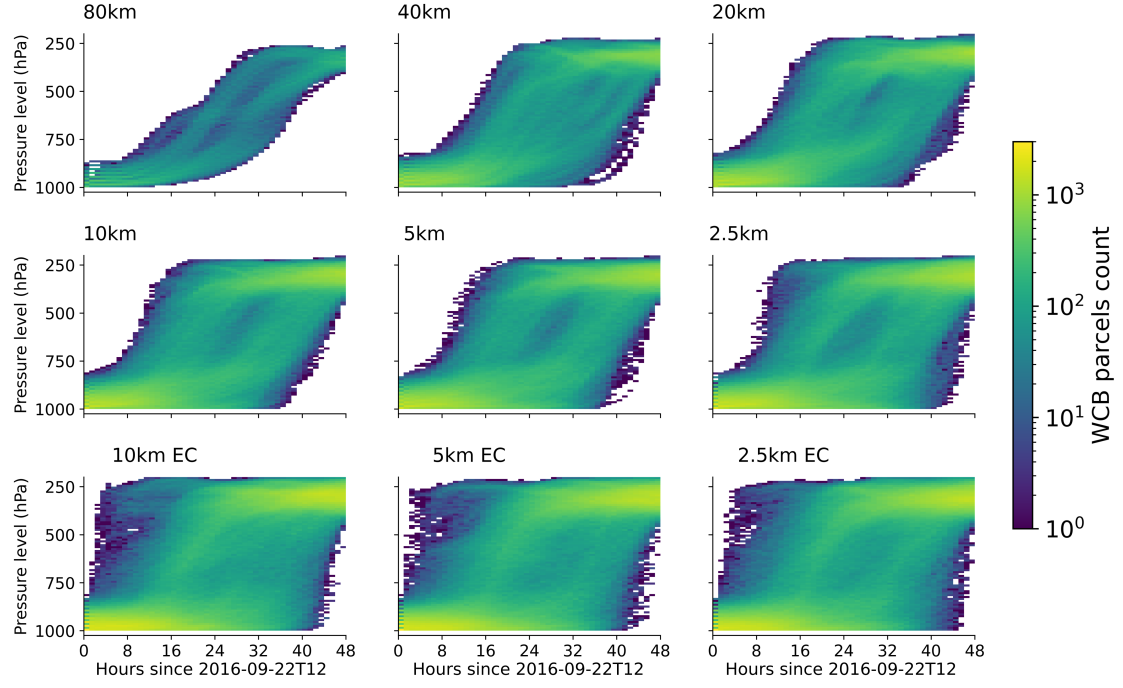

Figure S1: Histograms of the location of WCB air parcels as a function of time. The colour indicates the number of WCB parcels per time-pressure bin. The bin width is 1 h and 10 hPa. The figure shows simulations with one-moment cloud microphysics.

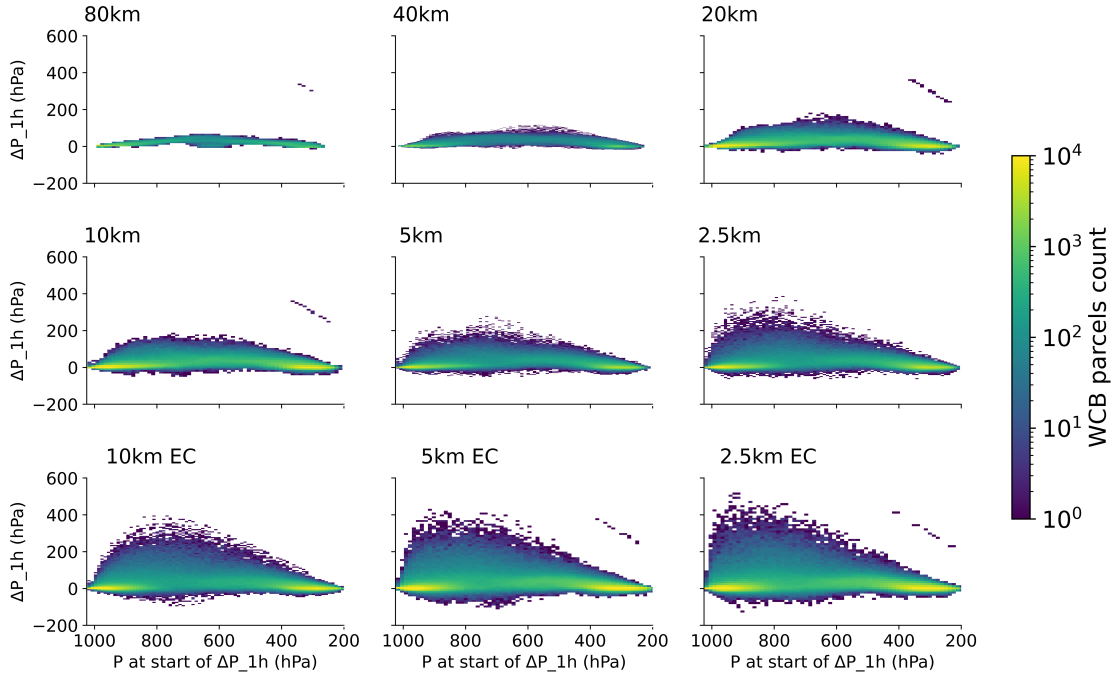

Figure S2: Histograms of pressure change of WCB air parcels over 1-hour periods,  $\Delta P_{1h}$ , as a function of their pressure location.  $\Delta P_{1h}(t)$  is calculated as  $P(t + 1h) - P(t)$ . The bin width is 10 hPa. The figure shows simulations with one-moment cloud microphysics.

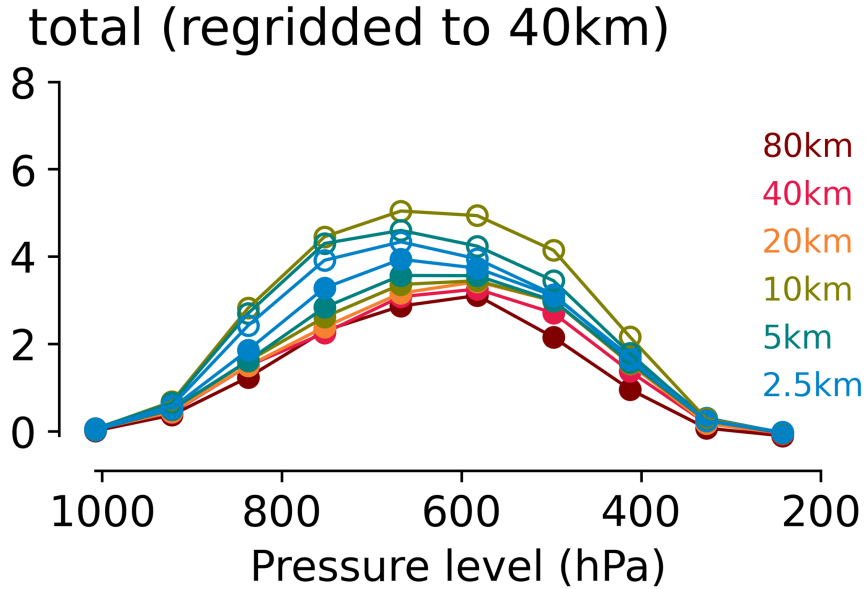

Figure S3: Total diabatic heating rate in  $K \cdot hour^{-1}$  along pressure levels for different grid spacings calculated as mean over all WCB trajectories. Different from Fig. 8a; the simulation data was conservatively interpolated to a common 40 km grid before the analysis. The lines with filled and empty markers represent simulations with parametrized and explicit convection respectively. The figure shows simulations with one-moment cloud microphysics.
